Title: CARBON DIOXIDE ELIMINATION DURING TOTAL CARDIOPULMONARY BYPASS IN INFANTS AND CHILDREN

Authors: D.R. Larach, M.D., Ph.D., F.A. Hensley, M.D., K.M. High, M.D., D.R. Williams, C.C.P., M.T. Snider, M.D., Ph.D.

Affiliation: Departments of Anesthesia and Surgery, The Pennsylvania State University College of Medicine, P.O. Box 850, Hershey, PA 17033

**INTRODUCTION:** The rates of CO<sub>2</sub> elimination ( $\dot{V}CO_2$ ) and oxygen uptake ( $\dot{V}O_2$ ) from the oxygenator during total cardiopulmonary bypass (CPB) reflect aerobic metabolic activity, tissue perfusion, and oxygenator function. We used multiplexed mass spectroscopy (MS) to perform routine monitoring of  $\dot{V}CO_2$  and  $\dot{V}O_2$  during CPB in infants and children.

**METHODS:** With Clinical Investigation Committee approval, we studied 25 pediatric patients, age 30.1±5.4 mo (2d–9.2y), weighing 11.7±0.4 kg (2.3–29 kg). Anesthetics during CPB included only fentanyl and pancuronium. Cooling to 19.4±0.5°C (venous temperature,  $T_v$ ) was achieved with integral heat exchangers of American Bentley BEN 5 or BIO 2 bubble oxygenators. All patients received phenolamine 0.75 mg·kg<sup>-1</sup>. Circulatory arrest patients (n=10, 34±4 min), also received surface cooling. **Technique:** We modified and simplified the method of Abbott *et al.*<sup>1</sup> (gas phase Fick principle<sup>2</sup>) to measure  $\dot{V}CO_2$  and  $\dot{V}O_2$  in real-time. A multiplexed MS (Perkin-Elmer Advantage) analyzed gas from the oxygenator exhaust port during total CPB. Inflow gas to the oxygenator was primarily O<sub>2</sub> (F<sub>i</sub>CO<sub>2</sub><0.1%; F<sub>i</sub>N<sub>2</sub><4.5%). At 5–15 min intervals (except during circulatory arrest or partial CPB), we recorded venous, nasopharyngeal, and rectal temperatures, gas flow, and inlet (i) and exhaust (e) CO<sub>2</sub>, O<sub>2</sub>, and N<sub>2</sub> fractional concentrations (F).  $\dot{V}CO_2$  (in ml·min<sup>-1</sup>·kg<sup>-1</sup>) was calculated as {F<sub>e</sub>CO<sub>2</sub>} × {gas flow} ÷ kg.  $\dot{V}O_2$  was computed from: {F<sub>i</sub>O<sub>2</sub>–F<sub>e</sub>O<sub>2</sub>} × {gas flow} ÷ kg (n=83). Respiratory quotient (RQ), and Q<sub>10</sub> (the increase in metabolic activity produced by a 10°C rise), were determined from the regression slopes of  $\dot{V}CO_2$  vs.  $\dot{V}O_2$  and  $\dot{V}CO_2$  vs.  $T_v$ , respectively. If F<sub>i</sub>N<sub>2</sub>>5% (room air contamination), data were not analyzed. After a log transform produced homoscedasticity, ANOVA determined significance (α=.05). Values are mean±SEM, and the graph shows the regression line and 95% prediction interval.

**RESULTS** (Figure) CO<sub>2</sub> elimination correlated highly with  $T_v$  (r=0.88, P<.0001, n=199;  $\dot{V}CO_2=0.30 \times T_v - 4.5$ ) over a  $T_v$  range of 16.8–39.5°C. Similarly, oxygen uptake was correlated with  $T_v$  (r=0.79, P<.0001, n=83; regression equation  $\log_{10} \dot{V}O_2=0.030 \times T_v - 0.13$ ).  $\dot{V}CO_2$  correlated better with venous temperature than with the other temperature monitoring sites.

$\dot{V}CO_2$  also correlated well with  $\dot{V}O_2$  (r=0.94, P<.0001,  $\dot{V}CO_2=0.60 \times \dot{V}O_2 + 0.31$ ) indicating a mean RQ of 0.60. The RQ tended to decrease with lower temperatures. The  $\dot{V}CO_2$  vs.  $T_v$  regression indicated a mean Q<sub>10</sub> of 3.0. The use of circulatory arrest did not affect either the  $T_v$ – $\dot{V}CO_2$  (P=.55), or the  $T_v$ – $\dot{V}O_2$  (P=.26) relationships.

**DISCUSSION:** We demonstrated that the rates of CO<sub>2</sub> elimination and O<sub>2</sub> uptake are easily measured in the gas phase during CPB, are more informative than measuring

P<sub>e</sub>CO<sub>2</sub> alone<sup>3</sup>, and may be valuable as a routine clinical tool. Because  $\dot{V}CO_2$  and  $\dot{V}O_2$  are highly correlated, we recommend CO<sub>2</sub> elimination as the better test for routine monitoring.

$\dot{V}CO_2$  during CPB has been measured previously in only 4 patients, and without real-time results<sup>1</sup>. The rise in  $\dot{V}CO_2$  seen with increasing  $T_v$  may be due to greater metabolic CO<sub>2</sub> generation, mobilization of CO<sub>2</sub> tissue stores, and reduced gas solubility in blood. These factors all tend to increase blood CO<sub>2</sub> delivery to the oxygenator. Decreased RQ with hypothermia may reflect preferential sequestration of CO<sub>2</sub> in blood and tissues at low  $T_v$ . A Q<sub>10</sub> of 3.0 is consistent with most biological systems.

$\dot{V}CO_2$  values above normal for a given  $T_v$  may indicate hyperactive metabolism; this technique may be valuable for detecting malignant hyperthermia crisis during rewarming on CPB, when temperature normally rises quickly. Also, subclinical shivering may elevate  $\dot{V}CO_2$ , helping to guide muscle relaxant administration.  $\dot{V}CO_2$  values below normal for a given  $T_v$  may indicate: 1) non-uniform regional blood flow, which may benefit from vasodilator therapy; 2) impaired O<sub>2</sub> delivery to tissues; and 3) oxygenator malfunction. Also, high P<sub>e</sub>CO<sub>2</sub> with normal  $\dot{V}CO_2$  may signify inadequate gas inflow. Real-time determination CO<sub>2</sub> elimination may be a useful continuous monitor of metabolic, circulatory, and oxygenator function during CPB, and may help guide drug therapy.

REFERENCES

- Abbott TR, Goodwin B, Clark G, Flees GJ: Mass spectrometer measurement of O<sub>2</sub> uptake and CO<sub>2</sub> exchange during CPB. Br J Anaesth 52:29–40, 1980
- Snider MT, Richardson PD, Friedman LI, Gallotti PM: Carbon dioxide transfer rate in artificial lungs. J Appl Physiol 36:233–239, 1974
- Jaffe TB, Bernhart J: CO<sub>2</sub> monitoring during CPB (letter). Anesthesiology 56:485, 1982.

CO<sub>2</sub> ELIMINATION RATE DURING CARDIOPULMONARY BYPASS

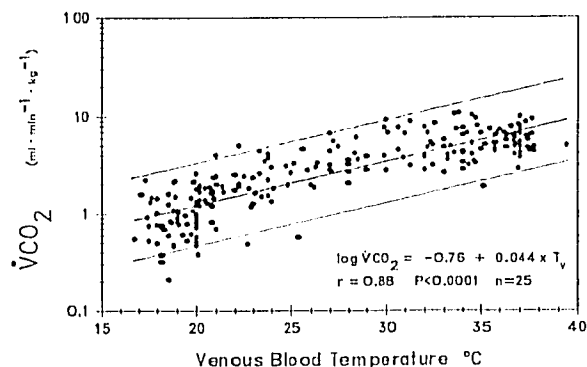

Source: https://asa2.silverchair.com/anesthesiology/article-pdf/67/3/A19/635860/0000542-198709001-00019.pdf
